# Supplementary material for: Identification of MicroRNA-Like RNAs in Mycelial and Yeast Phases of the Thermal Dimorphic Fungus Penicillium marneffei
Source: PLoS Negl Trop Dis. 2013 Aug 22;7(8):e2398. doi: 10.1371/journal.pntd.0002398 (PMC3749987; doi:10.1371/journal.pntd.0002398)
Supplement: Table S1 — Predicted targets of milRNAs in P. marneffei. (DOCX) [file pntd.0002398.s001.docx]

Supplementary Table S1. Predicted targets of milRNAs in *P. marneffei*

| milRNAs | target mRNA | site position | target length | Remarks: |
| --- | --- | --- | --- | --- |
| *PM-milR-M1* | XM_002153120.1| Ran-binding protein (RanBP10), putative, mRNA | 1385 | 2334 |  |
| *PM-milR-M1* | XM_002153301.1| conserved hypothetical protein, mRNA | 4470 | 4731 |  |
| *PM-milR-M1* | XM_002146036.1| benzoate 4-monooxygenase cytochrome P450, putative, mRNA | 267 | 1200 |  |
| *PM-milR-M2* | XM_002144076.1| transposon, putative, mRNA | 536 | 1757 |  |
| *PM-milR-M2* | XM_002144493.1| conserved hypothetical protein, mRNA | 365 | 1203 |  |
| *PM-milR-M2* | XM_002146057.1| pogo transposable element, putative, mRNA | 518 | 1821 |  |
| *PM-milR-M2* | XM_002146378.1| pogo transposable element, putative, mRNA | 227 | 1314 |  |
| *PM-milR-M2* | XM_002146381.1| pogo transposable element, putative, mRNA | 548 | 1698 |  |
| *PM-milR-M2* | XM_002146475.1| pogo transposable element, putative, mRNA | 518 | 1691 |  |
| *PM-milR-M2* | XM_002147154.1| conserved hypothetical protein, mRNA | 444 | 1531 |  |
| *PM-milR-M2* | XM_002148112.1| transposon, putative, mRNA | 518 | 1521 |  |
| *PM-milR-M2* | XM_002148442.1| conserved hypothetical protein, mRNA | 227 | 1245 |  |
| *PM-milR-M2* | XM_002148795.1| transposon, putative, mRNA | 518 | 1668 |  |
| *PM-milR-M2* | XM_002149109.1| conserved hypothetical protein, mRNA | 227 | 756 |  |
| *PM-milR-M2* | XM_002149110.1| pogo transposable element, putative, mRNA | 518 | 1668 |  |
| *PM-milR-M2* | XM_002149111.1| conserved hypothetical protein, mRNA | 518 | 1281 |  |
| *PM-milR-M2* | XM_002150101.1| transposon, putative, mRNA | 569 | 1233 |  |
| *PM-milR-M2* | XM_002150513.1| pogo transposable element, putative, mRNA | 518 | 1852 |  |
| *PM-milR-M2* | XM_002150848.1| transposon, putative, mRNA | 518 | 1302 |  |
| *PM-milR-M2* | XM_002150952.1| conserved hypothetical protein, mRNA | 478 | 710 |  |
| *PM-milR-M2* | XM_002151776.1| pogo transposable element, putative, mRNA | 518 | 1560 |  |
| *PM-milR-M2* | XM_002151777.1| conserved hypothetical protein, mRNA | 521 | 1623 |  |
| *PM-milR-M2* | XM_002153191.1| pogo transposable element, putative, mRNA | 401 | 1557 |  |
| *PM-milR-MC3* | XM_002152788.1| conserved hypothetical protein, mRNA | 1852 | 5236 | perfectly complementary |
| *PM-milR-MC3* | XM_002149766.1| conserved hypothetical protein, mRNA | 1641 | 4431 | perfectly complementary |
| *PM-milR-MC3* | XM_002148515.1| conserved hypothetical protein, mRNA | 1572 | 4494 | perfectly complementary |
| *PM-milR-MC3* | XM_002147049.1| conserved hypothetical protein, mRNA | 1641 | 4671 | perfectly complementary |
| *PM-milR-MC3* | XM_002147049.1| conserved hypothetical protein, mRNA | 1640 | 4671 |  |
| *PM-milR-MC3* | XM_002148515.1| conserved hypothetical protein, mRNA | 1571 | 4494 |  |
| *PM-milR-MC3* | XM_002149766.1| conserved hypothetical protein, mRNA | 1640 | 4431 |  |
| *PM-milR-MC3* | XM_002151360.1| conserved hypothetical protein, mRNA | 1016 | 1429 |  |
| *PM-milR-MC3* | XM_002152788.1| conserved hypothetical protein, mRNA | 1851 | 5236 |  |
| *PM-milR-MC4* | no predicted targets |  |  |  |
| *PM-milR-MC5* | XM_002143303.1| hypothetical protein, mRNA | 856 | 956 |  |
| *PM-milR-MC5* | XM_002149698.1| protein kinase, putative, mRNA | 730 | 3773 |  |
| *PM-milR-MC6* | no predicted targets |  |  |  |
| *PM-milR-MC7* | XM_002144095.1| conserved hypothetical protein, mRNA | 1101 | 1421 |  |
| *PM-milR-MC7* | XM_002145998.1| CDP-diacylglycerol-inositol 3-phosphatidyltransferase PIS, mRNA | 13 | 1733 |  |
| *PM-milR-MC7* | XM_002146689.1| pyroglutamyl peptidase type I, putative, mRNA | 811 | 1356 |  |
| *PM-milR-MC8* | XM_002143560.1| ubiquitin conjugating enzyme, putative, mRNA | 3383 | 3554 |  |
| *PM-milR-MC8* | XM_002145926.1| hypothetical protein, mRNA | 165 | 1422 |  |
| *PM-milR-MC8* | XM_002147636.1| conserved hypothetical protein, mRNA | 1105 | 4522 |  |
| *PM-milR-MC8* | XM_002147898.1| conserved hypothetical protein, mRNA | 1302 | 2949 |  |
| *PM-milR-MC8* | XM_002150344.1| tryptophanyl-tRNA synthetase, mRNA | 1137 | 1748 |  |
| *PM-milR-MC8* | XM_002150345.1| tryptophanyl-tRNA synthetase, mRNA | 1192 | 1803 |  |
| *PM-milR-MC8* | XM_002153352.1| short-chain dehydrogenase/reductase, putative, mRNA | 833 | 1023 |  |
| *PM-milR-MC9* | XM_002147966.1| 5-proFAR isomerase His6, putative, mRNA | 1208 | 1596 |  |
| *PM-milR-MC9* | XM_002143711.1| DUF221 domain protein, putative, mRNA | 1223 | 3060 |  |
| *PM-milR-MC9* | XM_002144412.1| dDENN domain protein, mRNA | 477 | 4125 |  |
| *PM-milR-MC9* | XM_002145846.1| acid sphingomyelinase, putative, mRNA | 644 | 1884 |  |
| *PM-milR-MC9* | XM_002147966.1| 5-proFAR isomerase His6, putative, mRNA | 1207 | 1596 | perfectly complementary |
| *PM-milR-MC9* | XM_002150722.1| isopropanol dehydrogenase, putative, mRNA | 215 | 1116 |  |
| *PM-milR-MC9* | XM_002151377.1| nuclear pore complex protein Nup107, putative, mRNA | 14 | 3207 |  |
| *PM-milR-MC10* | XM_002144658.1| GPI transamidase component Gpi16, putative, mRNA | 160 | 1952 |  |
| *PM-milR-MC10* | XM_002145491.1| nuclear cohesin complex subunit (Psc3), putative, mRNA | 2017 | 4206 |  |
| *PM-milR-MC10* | XM_002145572.1| hypothetical protein, mRNA | 1098 | 1131 |  |
| *PM-milR-MC10* | XM_002145754.1| conserved hypothetical protein, mRNA | 428 | 1081 |  |
| *PM-milR-MC10* | XM_002146417.1| L-ornithine N5-oxygenase SidA, mRNA | 368 | 2084 |  |
| *PM-milR-MC10* | XM_002146889.1| DNA replication initiation factor Cdc45, mRNA | 270 | 3001 |  |
| *PM-milR-MC10* | XM_002148504.1| NF-X1 finger transcription factor, putative, mRNA | 414 | 3546 |  |
| *PM-milR-MC10* | XM_002148702.1| conserved hypothetical protein, mRNA | 996 | 1418 |  |
| *PM-milR-MC10* | XM_002148794.1| urease accessory protein UreG, putative, mRNA | 353 | 1232 |  |
| *PM-milR-MC10* | XM_002150625.1| amino acid permease, putative, mRNA | 1534 | 1915 |  |
| *PM-milR-MC10* | XM_002152780.1| acetyltransferase, GNAT family, putative, mRNA | 324 | 919 |  |
| *PM-milR-MC10* | XM_002152970.1| transcription factor (Sin3), putative, mRNA | 3414 | 4785 |  |
| *PM-milR-MC10* | XM_002153528.1| conserved hypothetical protein, mRNA | 2775 | 3763 |  |
| *PM-milR-MC10* | XM_002143182.1| conserved hypothetical protein, mRNA | 88 | 1700 |  |
| *PM-milR-MC10* | XM_002144551.1| conserved hypothetical protein, mRNA | 1203 | 2472 |  |
| *PM-milR-MC10* | XM_002145021.1| phosphotidylinositol kinase Tel1, putative, mRNA | 3552 | 8765 |  |
| *PM-milR-MC10* | XM_002145353.1| C6 transcription factor, putative, mRNA | 489 | 2682 |  |
| *PM-milR-MC10* | XM_002145900.1| conserved hypothetical protein, mRNA | 1730 | 2289 |  |
| *PM-milR-MC10* | XM_002147805.1| UBA/TS-N domain protein, mRNA | 766 | 2833 |  |
| *PM-milR-MC10* | XM_002148424.1| aldehyde dehydrogenase, putative, mRNA | 238 | 1410 |  |
| *PM-milR-MC10* | XM_002149731.1| fatty acid synthase subunit beta, putative, mRNA | 3654 | 6138 |  |
| *PM-milR-MC10* | XM_002150328.1| translation factor pelota, putative, mRNA | 1049 | 1302 |  |
| *PM-milR-MC10* | XM_002151211.1| SET domain protein, mRNA | 1293 | 2246 |  |
| *PM-milR-MC10* | XM_002152220.1| monocarboxylate permease, putative, mRNA | 269 | 1949 |  |
| *PM-milR-MC10* | XM_002152640.1| oxysterol binding protein (Orp8), putative, mRNA | 249 | 2010 |  |
| *PM-milR-MC10* | XM_002152641.1| oxysterol binding protein (Orp8), putative, mRNA | 249 | 2406 |  |
| *PM-milR-MC10* | XM_002152832.1| conserved hypothetical protein, mRNA | 81 | 1640 |  |
| *PM-milR-MC10* | XM_002153112.1| conserved hypothetical protein, mRNA | 1037 | 1602 |  |
| *PM-milR-MC11* | XM_002151533.1| phosphoglycerate kinase PgkA, putative, mRNA | 1821 | 2072 |  |
| *PM-milR-MC11* | XM_002143366.1| conserved hypothetical protein, mRNA | 539 | 954 |  |
| *PM-milR-MC11* | XM_002143532.1| conserved hypothetical protein, mRNA | 1685 | 2076 |  |
| *PM-milR-MC11* | XM_002144993.1| ATP dependent RNA helicase (Dbp7), putative, mRNA | 290 | 2440 |  |
| *PM-milR-MC11* | XM_002145208.1| conserved hypothetical protein, mRNA | 2273 | 2502 |  |
| *PM-milR-MC11* | XM_002145845.1| 6-phosphogluconate dehydrogenase, decarboxylating, mRNA | 227 | 1814 |  |
| *PM-milR-MC11* | XM_002148867.1| conserved hypothetical protein, mRNA | 109 | 2589 |  |
| *PM-milR-MC11* | XM_002150791.1| nonribosomal peptide synthase, putative, mRNA | 21388 | 23706 |  |
| *PM-milR-MC11* | XM_002151533.1| phosphoglycerate kinase PgkA, putative, mRNA | 1820 | 2072 | perfectly complementary |
| *PM-milR-MC12* | XM_002143267.1| conserved hypothetical protein, mRNA | 544 | 1131 |  |
| *PM-milR-MC12* | XM_002144529.1| actin cortical patch component, putative, mRNA | 756 | 2062 |  |
| *PM-milR-MC12* | XM_002143357.1| MFS sugar transporter, putative, mRNA | 1560 | 1785 |  |
| *PM-milR-MC12* | XM_002149005.1| conserved hypothetical protein, mRNA | 1220 | 1281 |  |
| *PM-milR-MC12* | XM_002151349.1| alkaline dihydroceramidase Ydc1, putative, mRNA | 499 | 1809 |  |
| *PM-milR-MC12* | XM_002152758.1| hypothetical protein, mRNA | 467 | 900 |  |
| *PM-milR-MC12* | XM_002153341.1| tubulin-specific chaperone c, putative, mRNA | 914 | 1407 |  |
| *PM-milR-MC13* | XM_002143573.1| short-chain dehydrogenase/reductase family protein, putative, mRNA | 394 | 1131 |  |
| *PM-milR-MC13* | XM_002146227.1| gamma-tubulin complex component GCP6, putative, mRNA | 1911 | 2994 |  |
| *PM-milR-MC13* | XM_002148722.1| F-box and WD repeat-containing protein, mRNA | 334 | 2467 |  |
| *PM-milR-MC13* | XM_002150686.1| conserved hypothetical protein, mRNA | 431 | 660 |  |
| *PM-milR-MC13* | XM_002144119.1| quinone oxidoreductase, putative, mRNA | 837 | 1120 |  |
| *PM-milR-MC13* | XM_002146034.1| conserved hypothetical protein, mRNA | 673 | 1540 |  |
| *PM-milR-MC13* | XM_002146249.1| RNA-binding La domain protein, mRNA | 914 | 1389 |  |
| *PM-milR-MC13* | XM_002146539.1| conserved hypothetical protein, mRNA | 774 | 1197 |  |
| *PM-milR-MC13* | XM_002148831.1| structural maintenance of chromosome complex subunit SmcA, mRNA | 759 | 3566 |  |
| *PM-milR-MC13* | XM_002149451.1| short-chain dehydrogenase, putative, mRNA | 355 | 937 |  |
| *PM-milR-MC13* | XM_002150156.1| small monomeric GTPase SarA, putative, mRNA | 456 | 1266 |  |
| *PM-milR-MC13* | XM_002150157.1| small monomeric GTPase SarA, putative, mRNA | 456 | 1323 |  |
| *PM-milR-MC13* | XM_002150325.1| hypothetical protein, mRNA | 1883 | 3123 |  |
| *PM-milR-MC13* | XM_002153241.1| cytokinesis protein SepA/Bni1, mRNA | 748 | 5349 |  |
| *PM-milR-MC14* | no predicted targets |  |  |  |
| *PM-milR-MC15* | XM_002147735.1| conserved hypothetical protein, mRNA | 208 | 1442 |  |
| *PM-milR-MC15* | XM_002150342.1| conserved hypothetical protein, mRNA | 1008 | 3249 |  |
| *PM-milR-MC16* | XM_002144804.1| DNA ligase, putative, mRNA | 1540 | 3018 |  |
| *PM-milR-MC16* | XM_002147153.1| conserved hypothetical protein, mRNA | 686 | 1596 |  |
| *PM-milR-MC16* | XM_002145202.1| fermentation associated protein (Csf1), putative, mRNA | 5247 | 9806 |  |
| *PM-milR-MC16* | XM_002149691.1| conserved hypothetical protein, mRNA | 260 | 1392 |  |
| *PM-milR-MC16* | XM_002150141.1| 60S ribosomal protein P0, mRNA | 245 | 1160 |  |
| *PM-milR-MC16* | XM_002153508.1| conserved hypothetical protein, mRNA | 1290 | 1708 |  |
| *PM-milR-MC17* | XM_002143166.1| conserved hypothetical protein, mRNA | 547 | 2290 |  |
| *PM-milR-MC17* | XM_002143188.1| UTP-glucose-1-phosphate uridylyltransferase Ugp1, putative, mRNA | 613 | 1982 |  |
| *PM-milR-MC17* | XM_002143189.1| UTP-glucose-1-phosphate uridylyltransferase Ugp1, putative, mRNA | 719 | 2088 |  |
| *PM-milR-MC17* | XM_002143251.1| gibberellin 20 oxidase, putative, mRNA | 73 | 948 |  |
| *PM-milR-MC17* | XM_002143300.1| chitin synthase activator (Chs3), putative, mRNA | 24 | 2925 |  |
| *PM-milR-MC17* | XM_002143308.1| beta-glucosidase, putative, mRNA | 450 | 3051 |  |
| *PM-milR-MC17* | XM_002143637.1| stress response protein Nst1, putative, mRNA | 847 | 4314 |  |
| *PM-milR-MC17* | XM_002143694.1| malate synthase AcuE, mRNA | 1495 | 1880 |  |
| *PM-milR-MC17* | XM_002143697.1| 5',5'''-P-1,P-4-tetraphosphate phosphorylase, putative, mRNA | 928 | 1409 |  |
| *PM-milR-MC17* | XM_002143913.1| ubiquitin conjugating enzyme (UbcB), putative, mRNA | 357 | 969 |  |
| *PM-milR-MC17* | XM_002143926.1| ABC multidrug transporter, putative, mRNA | 86 | 4392 |  |
| *PM-milR-MC17* | XM_002144039.1| MFS sugar transporter, putative, mRNA | 781 | 1746 |  |
| *PM-milR-MC17* | XM_002144167.1| GPI anchored serine-threonine rich protein, mRNA | 528 | 761 |  |
| *PM-milR-MC17* | XM_002144293.1| C2H2 transcription factor Crz1, putative, mRNA | 1386 | 2480 |  |
| *PM-milR-MC17* | XM_002144434.1| conserved hypothetical protein, mRNA | 7 | 1633 |  |
| *PM-milR-MC17* | XM_002144588.1| conserved hypothetical protein, mRNA | 3304 | 3870 |  |
| *PM-milR-MC17* | XM_002144714.1| cysteine-binding protein FliY, putative, mRNA | 1387 | 1878 |  |
| *PM-milR-MC17* | XM_002144759.1| RNA helicase/RNAse III, putative, mRNA | 2685 | 4701 |  |
| *PM-milR-MC17* | XM_002144806.1| conserved hypothetical protein, mRNA | 1125 | 1755 |  |
| *PM-milR-MC17* | XM_002144862.1| hypothetical protein, mRNA | 42 | 888 |  |
| *PM-milR-MC17* | XM_002144899.1| mRNA cap methyltransferase, mRNA | 688 | 2103 |  |
| *PM-milR-MC17* | XM_002145060.1| conserved hypothetical protein, mRNA | 469 | 1801 |  |
| *PM-milR-MC17* | XM_002145201.1| translation elongation factor EF-2 subunit, putative, mRNA | 537 | 2855 |  |
| *PM-milR-MC17* | XM_002145286.1| kinesin family protein, mRNA | 4760 | 5689 |  |
| *PM-milR-MC17* | XM_002145338.1| MFS transporter, putative, mRNA | 1139 | 2071 |  |
| *PM-milR-MC17* | XM_002145353.1| C6 transcription factor, putative, mRNA | 1034 | 2682 |  |
| *PM-milR-MC17* | XM_002145384.1| conserved hypothetical protein, mRNA | 2389 | 2828 |  |
| *PM-milR-MC17* | XM_002145457.1| Rho guanyl nucleotide exchange factor, putative, mRNA | 3854 | 5908 |  |
| *PM-milR-MC17* | XM_002145475.1| tetracycline-efflux transporter, putative, mRNA | 1677 | 1939 |  |
| *PM-milR-MC17* | XM_002145478.1| PAP/25A associated domain family, mRNA | 1671 | 3180 |  |
| *PM-milR-MC17* | XM_002145525.1| mitochondrial carrier protein (Leu5), putative, mRNA | 1230 | 1945 |  |
| *PM-milR-MC17* | XM_002145795.1| conserved hypothetical protein, mRNA | 2871 | 4097 |  |
| *PM-milR-MC17* | XM_002145805.1| ribosomal protein S13p/S18e, mRNA | 423 | 783 |  |
| *PM-milR-MC17* | XM_002145806.1| ribosomal protein S13p/S18e, mRNA | 535 | 895 |  |
| *PM-milR-MC17* | XM_002145831.1| RanGTP-binding protein, mRNA | 1191 | 1998 |  |
| *PM-milR-MC17* | XM_002145952.1| cation diffusion facilitator 1, mRNA | 850 | 1496 |  |
| *PM-milR-MC17* | XM_002145963.1| poly(A)-binding protein-dependent poly(A) ribonuclease, putative, mRNA | 1883 | 1966 |  |
| *PM-milR-MC17* | XM_002145964.1| poly(A)-binding protein-dependent poly(A) ribonuclease, putative, mRNA | 130 | 2676 |  |
| *PM-milR-MC17* | XM_002146014.1| conserved hypothetical protein, mRNA | 492 | 1614 |  |
| *PM-milR-MC17* | XM_002146259.1| sexual development activator VeA, mRNA | 981 | 2092 |  |
| *PM-milR-MC17* | XM_002146301.1| topoisomerase family protein TRF4, putative, mRNA | 1834 | 2336 |  |
| *PM-milR-MC17* | XM_002146362.1| DNA excision repair protein Rad16, putative, mRNA | 609 | 3267 |  |
| *PM-milR-MC17* | XM_002146577.1| RNA binding protein Jsn1, putative, mRNA | 504 | 3989 |  |
| *PM-milR-MC17* | XM_002146594.1| NADH-ubiquinone oxidoreductase 64 kDa subunit, putative, mRNA | 254 | 2085 |  |
| *PM-milR-MC17* | XM_002146605.1| short-chain dehydrogenase, putative, mRNA | 372 | 1689 |  |
| *PM-milR-MC17* | XM_002146662.1| conserved hypothetical protein, mRNA | 175 | 3148 |  |
| *PM-milR-MC17* | XM_002146680.1| RNP domain protein, mRNA | 39 | 1116 |  |
| *PM-milR-MC17* | XM_002146725.1| retrograde regulation protein 2, mRNA | 954 | 1749 |  |
| *PM-milR-MC17* | XM_002146727.1| thiazole biosynthesis enzyme, mRNA | 71 | 2558 |  |
| *PM-milR-MC17* | XM_002146773.1| topisomerase II associated protein (Pat1), putative, mRNA | 798 | 2774 |  |
| *PM-milR-MC17* | XM_002146782.1| C6 transcription factor, putative, mRNA | 1759 | 3353 |  |
| *PM-milR-MC17* | XM_002146815.1| aldo-keto reductase (AKR13), putative, mRNA | 475 | 1032 |  |
| *PM-milR-MC17* | XM_002146960.1| conserved hypothetical protein, mRNA | 540 | 1764 |  |
| *PM-milR-MC17* | XM_002146989.1| nonribosomal peptide synthase, putative, mRNA | 3631 | 16992 |  |
| *PM-milR-MC17* | XM_002147001.1| mitochondrial cation transporter, putative, mRNA | 446 | 1196 |  |
| *PM-milR-MC17* | XM_002147233.1| multidrug resistance protein fnx1, putative, mRNA | 292 | 1765 |  |
| *PM-milR-MC17* | XM_002147333.1| transcriptional regulator (Cti6), putative, mRNA | 905 | 2310 |  |
| *PM-milR-MC17* | XM_002147343.1| conserved hypothetical protein, mRNA | 532 | 2055 |  |
| *PM-milR-MC17* | XM_002147354.1| trehalose-phosphate synthase/phosphatase complex subunit Tps1, putative, mRNA | 2115 | 2240 |  |
| *PM-milR-MC17* | XM_002147356.1| AAA family ATPase, putative, mRNA | 107 | 2598 |  |
| *PM-milR-MC17* | XM_002147366.1| stress response transcription factor SrrA/Skn7, putative, mRNA | 196 | 1917 |  |
| *PM-milR-MC17* | XM_002147383.1| triglyceride lipase-cholesterol esterase, putative, mRNA | 478 | 1828 |  |
| *PM-milR-MC17* | XM_002147384.1| triglyceride lipase-cholesterol esterase, putative, mRNA | 552 | 1902 |  |
| *PM-milR-MC17* | XM_002147438.1| alpha-1,6-mannosyltransferase subunit (Och1), putative, mRNA | 508 | 1931 |  |
| *PM-milR-MC17* | XM_002147472.1| MAP kinase MpkA, mRNA | 1638 | 1976 |  |
| *PM-milR-MC17* | XM_002147550.1| cytochrome c oxidase subunit Va, putative, mRNA | 119 | 813 |  |
| *PM-milR-MC17* | XM_002147744.1| mitochondrial export translocase Oxa1, putative, mRNA | 1574 | 1906 |  |
| *PM-milR-MC17* | XM_002147775.1| signal recognition particle protein SRP54, mRNA | 107 | 1614 |  |
| *PM-milR-MC17* | XM_002147794.1| AP-1 adaptor complex subunit mu, putative, mRNA | 711 | 2751 |  |
| *PM-milR-MC17* | XM_002147911.1| alcohol dehydrogenase, putative, mRNA | 659 | 1223 |  |
| *PM-milR-MC17* | XM_002148132.1| 40S ribosomal protein S3Ae, mRNA | 452 | 1170 |  |
| *PM-milR-MC17* | XM_002148177.1| betaine aldehyde dehydrogenase (BadH), putative, mRNA | 961 | 1497 |  |
| *PM-milR-MC17* | XM_002148297.1| cytochrome P450 phenylacetate 2-hydroxylase, putative, mRNA | 1033 | 1883 |  |
| *PM-milR-MC17* | XM_002148343.1| phosphoglycerate mutase family protein, putative, mRNA | 29 | 525 |  |
| *PM-milR-MC17* | XM_002148414.1| glycogen debranching enzyme Gdb1, putative, mRNA | 3900 | 4741 |  |
| *PM-milR-MC17* | XM_002148500.1| glucooligosaccharide oxidase, putative, mRNA | 1346 | 1578 |  |
| *PM-milR-MC17* | XM_002148546.1| cytosolic phospholipase A2, putative, mRNA | 462 | 2223 |  |
| *PM-milR-MC17* | XM_002148648.1| hypothetical protein, mRNA | 221 | 2074 |  |
| *PM-milR-MC17* | XM_002148673.1| malate dehydrogenase, NAD-dependent, mRNA | 745 | 1169 |  |
| *PM-milR-MC17* | XM_002148740.1| mitochondrial large ribosomal subunit protein L16, putative, mRNA | 856 | 956 |  |
| *PM-milR-MC17* | XM_002148752.1| glucan endo-1,3-alpha-glucosidase agn1 precursor, putative, mRNA | 167 | 1850 |  |
| *PM-milR-MC17* | XM_002148871.1| conserved hypothetical protein, mRNA | 815 | 1375 |  |
| *PM-milR-MC17* | XM_002148882.1| COPII vesicles protein Yip3, putative, mRNA | 411 | 2067 |  |
| *PM-milR-MC17* | XM_002149120.1| cytokinesis regulator (Byr4), putative, mRNA | 789 | 3552 |  |
| *PM-milR-MC17* | XM_002149188.1| C6 transcription factor, putative, mRNA | 1680 | 2103 |  |
| *PM-milR-MC17* | XM_002149215.1| conserved hypothetical protein, mRNA | 382 | 881 |  |
| *PM-milR-MC17* | XM_002149253.1| conserved hypothetical protein, mRNA | 4343 | 4600 |  |
| *PM-milR-MC17* | XM_002149273.1| conserved hypothetical protein, mRNA | 18 | 1200 |  |
| *PM-milR-MC17* | XM_002149363.1| conserved hypothetical protein, mRNA | 86 | 1449 |  |
| *PM-milR-MC17* | XM_002149392.1| conserved hypothetical protein, mRNA | 805 | 3626 |  |
| *PM-milR-MC17* | XM_002149589.1| conserved hypothetical protein, mRNA | 943 | 1374 |  |
| *PM-milR-MC17* | XM_002149771.1| C6 finger domain protein, putative, mRNA | 1095 | 1518 |  |
| *PM-milR-MC17* | XM_002149890.1| cell cycle control protein (Cwf22), putative, mRNA | 96 | 2406 |  |
| *PM-milR-MC17* | XM_002149958.1| conserved hypothetical protein, mRNA | 157 | 3105 |  |
| *PM-milR-MC17* | XM_002150089.1| amino acid transporter, putative, mRNA | 1231 | 1800 |  |
| *PM-milR-MC17* | XM_002150212.1| ubiquitin-protein ligase (Hul4), putative, mRNA | 564 | 3735 |  |
| *PM-milR-MC17* | XM_002150301.1| UPF0136 domain protein, mRNA | 64 | 389 |  |
| *PM-milR-MC17* | XM_002150520.1| 60S ribosomal protein L37a, mRNA | 464 | 840 |  |
| *PM-milR-MC17* | XM_002150521.1| 60S ribosomal protein L37a, mRNA | 468 | 844 |  |
| *PM-milR-MC17* | XM_002150522.1| 60S ribosomal protein L37a, mRNA | 488 | 864 |  |
| *PM-milR-MC17* | XM_002150523.1| 60S ribosomal protein L37a, mRNA | 648 | 1024 |  |
| *PM-milR-MC17* | XM_002150707.1| conserved hypothetical protein, mRNA | 1793 | 3961 |  |
| *PM-milR-MC17* | XM_002150732.1| conserved hypothetical protein, mRNA | 828 | 1539 |  |
| *PM-milR-MC17* | XM_002150733.1| GPI anchored protein, putative, mRNA | 626 | 949 |  |
| *PM-milR-MC17* | XM_002150734.1| GPI anchored protein, putative, mRNA | 629 | 952 |  |
| *PM-milR-MC17* | XM_002150788.1| CCCH zinc finger protein, mRNA | 140 | 2238 |  |
| *PM-milR-MC17* | XM_002150807.1| carbamoyl-phosphate synthase, large subunit, mRNA | 120 | 3652 |  |
| *PM-milR-MC17* | XM_002150827.1| C6 finger domain protein, putative, mRNA | 1458 | 2832 |  |
| *PM-milR-MC17* | XM_002151085.1| serine/threonine-rich protein adg2 precursor, putative, mRNA | 499 | 1413 |  |
| *PM-milR-MC17* | XM_002151222.1| proteasome activator subunit 4, putative, mRNA | 4823 | 6537 |  |
| *PM-milR-MC17* | XM_002151246.1| glycerol-3-phosphate acyltransferase Sct1, putative, mRNA | 1588 | 2354 |  |
| *PM-milR-MC17* | XM_002151266.1| conserved hypothetical protein, mRNA | 200 | 1152 |  |
| *PM-milR-MC17* | XM_002151337.1| DNA replication helicase Dna2, putative, mRNA | 4355 | 5013 |  |
| *PM-milR-MC17* | XM_002151559.1| DEAD/DEAH box RNA helicase, mRNA | 3088 | 3742 |  |
| *PM-milR-MC17* | XM_002151790.1| Rho GTPase activator (Bem3), putative, mRNA | 103 | 4241 |  |
| *PM-milR-MC17* | XM_002151839.1| mitochondrial translocase complex component (Tim50), putative, mRNA | 208 | 2142 |  |
| *PM-milR-MC17* | XM_002151906.1| SH3 domain protein, mRNA | 2646 | 4172 |  |
| *PM-milR-MC17* | XM_002151907.1| SH3 domain protein, mRNA | 2636 | 4162 |  |
| *PM-milR-MC17* | XM_002151918.1| cytosolic regulator Pianissimo, putative, mRNA | 1842 | 4068 |  |
| *PM-milR-MC17* | XM_002152013.1| alpha-1,3-glucan synthase Ags2, mRNA | 3072 | 7239 |  |
| *PM-milR-MC17* | XM_002152063.1| MFS monosaccharide transporter, putative, mRNA | 1626 | 1892 |  |
| *PM-milR-MC17* | XM_002152090.1| amino acid transporter, putative, mRNA | 1203 | 2019 |  |
| *PM-milR-MC17* | XM_002152200.1| conserved hypothetical protein, mRNA | 11258 | 30287 |  |
| *PM-milR-MC17* | XM_002152232.1| conserved hypothetical protein, mRNA | 192 | 1005 |  |
| *PM-milR-MC17* | XM_002152310.1| alcohol dehydrogenase, putative, mRNA | 188 | 1359 |  |
| *PM-milR-MC17* | XM_002152359.1| acetolactate synthase, putative, mRNA | 183 | 1812 |  |
| *PM-milR-MC17* | XM_002152383.1| mitochondrial carrier protein (Rim2), putative, mRNA | 392 | 1282 |  |
| *PM-milR-MC17* | XM_002152420.1| conserved hypothetical protein, mRNA | 876 | 1221 |  |
| *PM-milR-MC17* | XM_002152478.1| conserved hypothetical protein, mRNA | 96 | 778 |  |
| *PM-milR-MC17* | XM_002152558.1| 20S cyclosome subunit (APC1/BimE), putative, mRNA | 1612 | 6216 |  |
| *PM-milR-MC17* | XM_002152575.1| MAP kinase kinase Ste7, mRNA | 1167 | 2109 |  |
| *PM-milR-MC17* | XM_002152704.1| MFS transporter, putative, mRNA | 818 | 1556 |  |
| *PM-milR-MC17* | XM_002152730.1| high affinity methionine permease, mRNA | 38 | 1865 |  |
| *PM-milR-MC17* | XM_002153168.1| polysaccharide synthase Cps1, putative, mRNA | 967 | 2996 |  |
| *PM-milR-MC17* | XM_002153267.1| ABC drug exporter AtrF, mRNA | 2936 | 4605 |  |
| *PM-milR-MC17* | XM_002153332.1| threonine synthase Thr4, putative, mRNA | 900 | 1880 |  |
| *PM-milR-MC17* | XM_002153455.1| pyruvate dehydrogenase complex component Pdx1, putative, mRNA | 36 | 1261 |  |
| *PM-milR-MC17* | XM_002153693.1| hypothetical protein, mRNA | 226 | 1332 |  |
| *PM-milR-MC17* | XM_002143098.1| aspergillopepsin A precursor, putative, mRNA | 152 | 1128 |  |
| *PM-milR-MC17* | XM_002143164.1| beta-1,4-mannosyltransferase (Alg1), putative, mRNA | 458 | 1392 |  |
| *PM-milR-MC17* | XM_002143187.1| membrane bound C2 domain protein (vp115), putative, mRNA | 636 | 4725 |  |
| *PM-milR-MC17* | XM_002143192.1| MFS peptide transporter Ptr2, putative, mRNA | 1731 | 2067 |  |
| *PM-milR-MC17* | XM_002143202.1| UPF0183 domain protein, mRNA | 778 | 1736 |  |
| *PM-milR-MC17* | XM_002143225.1| farnesyl-diphosphate farnesyltransferase, putative, mRNA | 143 | 1798 |  |
| *PM-milR-MC17* | XM_002143281.1| glutamate carboxypeptidase Tre2, putative, mRNA | 553 | 3220 |  |
| *PM-milR-MC17* | XM_002143297.1| acetamidase, putative, mRNA | 1457 | 1863 |  |
| *PM-milR-MC17* | XM_002143309.1| nucleus export ATPase (Elf1), putative, mRNA | 3292 | 3700 |  |
| *PM-milR-MC17* | XM_002143339.1| F-box domain protein, mRNA | 2269 | 2640 |  |
| *PM-milR-MC17* | XM_002143358.1| COPII vesicle coat protein Sec16, putative, mRNA | 3838 | 5406 |  |
| *PM-milR-MC17* | XM_002143377.1| conserved hypothetical protein, mRNA | 5742 | 6236 |  |
| *PM-milR-MC17* | XM_002143431.1| ribonuclease P complex subunit Pop1, putative, mRNA | 109 | 2768 |  |
| *PM-milR-MC17* | XM_002143530.1| methyltransferase, putative, mRNA | 28 | 918 |  |
| *PM-milR-MC17* | XM_002143771.1| conserved hypothetical protein, mRNA | 372 | 2321 |  |
| *PM-milR-MC17* | XM_002143822.1| conserved hypothetical protein, mRNA | 309 | 2415 |  |
| *PM-milR-MC17* | XM_002143869.1| RTA1 domain protein, putative, mRNA | 979 | 1387 |  |
| *PM-milR-MC17* | XM_002143936.1| CP2 transcription factor, putative, mRNA | 1070 | 2886 |  |
| *PM-milR-MC17* | XM_002143974.1| ferric-chelate reductase, putative, mRNA | 340 | 2029 |  |
| *PM-milR-MC17* | XM_002144007.1| translation elongation factor EF-1 alpha subunit , putative, mRNA | 421 | 1523 |  |
| *PM-milR-MC17* | XM_002144018.1| BAG domain protein, mRNA | 981 | 1985 |  |
| *PM-milR-MC17* | XM_002144070.1| tRNA-specific adenosine deaminase, putative, mRNA | 1557 | 3645 |  |
| *PM-milR-MC17* | XM_002144110.1| conserved hypothetical protein, mRNA | 106 | 1716 |  |
| *PM-milR-MC17* | XM_002144340.1| pentatricopeptide repeat protein, mRNA | 55 | 2313 |  |
| *PM-milR-MC17* | XM_002144368.1| conserved hypothetical protein, mRNA | 479 | 1081 |  |
| *PM-milR-MC17* | XM_002144369.1| conserved hypothetical protein, mRNA | 548 | 1150 |  |
| *PM-milR-MC17* | XM_002144442.1| HLH DNA binding domain protein, putative, mRNA | 130 | 1421 |  |
| *PM-milR-MC17* | XM_002144448.1| dipeptidyl peptidase, putative, mRNA | 2952 | 3992 |  |
| *PM-milR-MC17* | XM_002144449.1| dipeptidyl peptidase, putative, mRNA | 2952 | 3935 |  |
| *PM-milR-MC17* | XM_002144450.1| dipeptidyl peptidase, putative, mRNA | 2952 | 3932 |  |
| *PM-milR-MC17* | XM_002144520.1| protein disulfide isomerase Pdi1, putative, mRNA | 1495 | 2381 |  |
| *PM-milR-MC17* | XM_002144648.1| ATP dependent RNA helicase, putative, mRNA | 1518 | 2358 |  |
| *PM-milR-MC17* | XM_002144699.1| cytochrome b5, putative, mRNA | 306 | 437 |  |
| *PM-milR-MC17* | XM_002144702.1| conserved hypothetical protein, mRNA | 1319 | 3720 |  |
| *PM-milR-MC17* | XM_002144790.1| conserved hypothetical protein, mRNA | 740 | 1703 |  |
| *PM-milR-MC17* | XM_002144820.1| AMP dependent CoA ligase, putative, mRNA | 738 | 1887 |  |
| *PM-milR-MC17* | XM_002144829.1| polyketide synthase, putative, mRNA | 748 | 5427 |  |
| *PM-milR-MC17* | XM_002144875.1| conserved hypothetical protein, mRNA | 610 | 1644 |  |
| *PM-milR-MC17* | XM_002144937.1| alcohol dehydrogenase, putative, mRNA | 389 | 1434 |  |
| *PM-milR-MC17* | XM_002145111.1| conserved hypothetical protein, mRNA | 300 | 1116 |  |
| *PM-milR-MC17* | XM_002145411.1| Ctr copper transporter family protein, mRNA | 610 | 1120 |  |
| *PM-milR-MC17* | XM_002145412.1| Ctr copper transporter family protein, mRNA | 840 | 1273 |  |
| *PM-milR-MC17* | XM_002145413.1| Ctr copper transporter family protein, mRNA | 610 | 1043 |  |
| *PM-milR-MC17* | XM_002145460.1| GTPase activating protein (Gyp2), putative, mRNA | 110 | 3603 |  |
| *PM-milR-MC17* | XM_002145569.1| conserved hypothetical protein, mRNA | 246 | 2601 |  |
| *PM-milR-MC17* | XM_002145570.1| conserved hypothetical protein, mRNA | 246 | 2660 |  |
| *PM-milR-MC17* | XM_002145648.1| NRPS-like enzyme, putative, mRNA | 873 | 3946 |  |
| *PM-milR-MC17* | XM_002145786.1| conserved hypothetical protein, mRNA | 770 | 1750 |  |
| *PM-milR-MC17* | XM_002145792.1| glutathione-S-transferase theta, GST, putative, mRNA | 37 | 657 |  |
| *PM-milR-MC17* | XM_002145796.1| conserved hypothetical protein, mRNA | 95 | 1716 |  |
| *PM-milR-MC17* | XM_002145799.1| GTPase activating protein (Evi5), putative, mRNA | 1124 | 2960 |  |
| *PM-milR-MC17* | XM_002145830.1| BSD domain protein, mRNA | 535 | 1197 |  |
| *PM-milR-MC17* | XM_002145865.1| beta-mannosidase, mRNA | 2426 | 2862 |  |
| *PM-milR-MC17* | XM_002145891.1| proline-specific permease, putative, mRNA | 1314 | 1650 |  |
| *PM-milR-MC17* | XM_002146007.1| conserved hypothetical protein, mRNA | 61 | 1215 |  |
| *PM-milR-MC17* | XM_002146054.1| BTB/POZ domain protein, mRNA | 313 | 1507 |  |
| *PM-milR-MC17* | XM_002146065.1| hypothetical protein, mRNA | 16 | 174 |  |
| *PM-milR-MC17* | XM_002146079.1| polyketide synthase, putative, mRNA | 896 | 7095 |  |
| *PM-milR-MC17* | XM_002146303.1| protein kinase C substrate, putative, mRNA | 351 | 1985 |  |
| *PM-milR-MC17* | XM_002146307.1| conserved hypothetical protein, mRNA | 521 | 1337 |  |
| *PM-milR-MC17* | XM_002146345.1| conserved hypothetical protein, mRNA | 336 | 3751 |  |
| *PM-milR-MC17* | XM_002146346.1| C2H2 zinc finger protein, mRNA | 303 | 3103 |  |
| *PM-milR-MC17* | XM_002146367.1| phosphatidylinositol 4-kinase (STT4), putative, mRNA | 266 | 7873 |  |
| *PM-milR-MC17* | XM_002146399.1| conserved hypothetical protein, mRNA | 735 | 1581 |  |
| *PM-milR-MC17* | XM_002146433.1| C6 transcription factor, putative, mRNA | 161 | 2103 |  |
| *PM-milR-MC17* | XM_002146461.1| involucrin repeat protein, mRNA | 17201 | 18527 |  |
| *PM-milR-MC17* | XM_002146469.1| O-methylsterigmatocystin oxidoreductase, putative, mRNA | 1441 | 1917 |  |
| *PM-milR-MC17* | XM_002146752.1| ribonucleotide reductase small subunit RnrA, putative, mRNA | 209 | 1621 |  |
| *PM-milR-MC17* | XM_002146935.1| conserved hypothetical protein, mRNA | 6 | 1658 |  |
| *PM-milR-MC17* | XM_002146956.1| conserved hypothetical protein, mRNA | 318 | 1062 |  |
| *PM-milR-MC17* | XM_002147089.1| C6 transcription factor, putative, mRNA | 189 | 2248 |  |
| *PM-milR-MC17* | XM_002147090.1| C6 transcription factor, putative, mRNA | 150 | 2209 |  |
| *PM-milR-MC17* | XM_002147183.1| aminotransferase family protein (LolT), putative, mRNA | 1218 | 1750 |  |
| *PM-milR-MC17* | XM_002147259.1| cytosolic large ribosomal subunit protein L7A, mRNA | 712 | 1157 |  |
| *PM-milR-MC17* | XM_002147335.1| Woronin body protein HexA, putative, mRNA | 1505 | 1919 |  |
| *PM-milR-MC17* | XM_002147461.1| cell wall glucanase (Scw4), putative, mRNA | 1616 | 2188 |  |
| *PM-milR-MC17* | XM_002147533.1| conserved hypothetical protein, mRNA | 1202 | 2027 |  |
| *PM-milR-MC17* | XM_002147541.1| AMID-like mitochondrial oxidoreductase, putative, mRNA | 874 | 1311 |  |
| *PM-milR-MC17* | XM_002147560.1| histone acetylase complex subunit Paf400, putative, mRNA | 1460 | 11574 |  |
| *PM-milR-MC17* | XM_002147624.1| DUF907 domain protein, mRNA | 69 | 2827 |  |
| *PM-milR-MC17* | XM_002147634.1| developmental regulatory protein WetA, mRNA | 1173 | 4366 |  |
| *PM-milR-MC17* | XM_002147660.1| LCCL domain protein, mRNA | 1060 | 2250 |  |
| *PM-milR-MC17* | XM_002147749.1| transcription initiation factor TFIID complex 60 kDa subunit, mRNA | 156 | 1793 |  |
| *PM-milR-MC17* | XM_002147836.1| dolichyl-phosphate beta-glucosyltransferase, putative, mRNA | 223 | 1576 |  |
| *PM-milR-MC17* | XM_002147883.1| conserved hypothetical protein, mRNA | 1012 | 1494 |  |
| *PM-milR-MC17* | XM_002147887.1| WD repeat protein, mRNA | 375 | 2486 |  |
| *PM-milR-MC17* | XM_002147901.1| importin beta-5 subunit, putative, mRNA | 151 | 3232 |  |
| *PM-milR-MC17* | XM_002147944.1| conserved hypothetical protein, mRNA | 930 | 1619 |  |
| *PM-milR-MC17* | XM_002147961.1| SNF2 family helicase/ATPase (Ino80), putative, mRNA | 2844 | 8085 |  |
| *PM-milR-MC17* | XM_002148028.1| aminopeptidase, putative, mRNA | 992 | 2316 |  |
| *PM-milR-MC17* | XM_002148057.1| conserved hypothetical protein, mRNA | 1222 | 1941 |  |
| *PM-milR-MC17* | XM_002148071.1| cytochrome P450, putative, mRNA | 398 | 1641 |  |
| *PM-milR-MC17* | XM_002148085.1| Golgi membrane protein, putative, mRNA | 694 | 987 |  |
| *PM-milR-MC17* | XM_002148160.1| calcium channel subunit Mid1, mRNA | 183 | 2072 |  |
| *PM-milR-MC17* | XM_002148173.1| hypothetical protein, mRNA | 151 | 753 |  |
| *PM-milR-MC17* | XM_002148186.1| conserved hypothetical protein, mRNA | 67 | 2550 |  |
| *PM-milR-MC17* | XM_002148196.1| mitochondrial Hsp70 chaperone (Ssc70), putative, mRNA | 398 | 2670 |  |
| *PM-milR-MC17* | XM_002148296.1| aquaporin transporter, putative, mRNA | 200 | 1077 |  |
| *PM-milR-MC17* | XM_002148459.1| aminoacyl-tRNA hydrolase, putative, mRNA | 489 | 918 |  |
| *PM-milR-MC17* | XM_002148460.1| aminoacyl-tRNA hydrolase, putative, mRNA | 469 | 898 |  |
| *PM-milR-MC17* | XM_002148461.1| aminoacyl-tRNA hydrolase, putative, mRNA | 469 | 1005 |  |
| *PM-milR-MC17* | XM_002148462.1| aminoacyl-tRNA hydrolase, putative, mRNA | 575 | 1004 |  |
| *PM-milR-MC17* | XM_002148475.1| GPI transamidase component PIG-U, putative, mRNA | 1041 | 1431 |  |
| *PM-milR-MC17* | XM_002148618.1| transcription factor Tos4, putative, mRNA | 753 | 1952 |  |
| *PM-milR-MC17* | XM_002148698.1| conserved hypothetical protein, mRNA | 1239 | 1913 |  |
| *PM-milR-MC17* | XM_002148892.1| CFEM domain protein, putative, mRNA | 674 | 896 |  |
| *PM-milR-MC17* | XM_002148896.1| endoplasmic reticulum calcium ATPase, putative, mRNA | 190 | 3456 |  |
| *PM-milR-MC17* | XM_002148922.1| snRNP assembly factor, putative, mRNA | 1254 | 1839 |  |
| *PM-milR-MC17* | XM_002149002.1| small nucleolar ribonucleoprotein complex subunit, putative, mRNA | 2156 | 3126 |  |
| *PM-milR-MC17* | XM_002149072.1| aminopeptidase, putative, mRNA | 3894 | 4106 |  |
| *PM-milR-MC17* | XM_002149082.1| conserved hypothetical protein, mRNA | 154 | 2643 |  |
| *PM-milR-MC17* | XM_002149083.1| polyketide synthase, putative, mRNA | 344 | 6429 |  |
| *PM-milR-MC17* | XM_002149085.1| Pumilio-family RNA binding repeat domain protein, mRNA | 46 | 2957 |  |
| *PM-milR-MC17* | XM_002149122.1| NADH-ubiquinone oxidoreductase, subunit G, putative, mRNA | 530 | 2772 |  |
| *PM-milR-MC17* | XM_002149207.1| glucan 1,4-alpha-glucosidase, putative, mRNA | 1534 | 1926 |  |
| *PM-milR-MC17* | XM_002149212.1| phospholipid-transporting ATPase (DRS2), putative, mRNA | 4501 | 5154 |  |
| *PM-milR-MC17* | XM_002149254.1| glutamate synthase Glt1, putative, mRNA | 5115 | 6784 |  |
| *PM-milR-MC17* | XM_002149282.1| 6-phosphofructo-2-kinase 1, mRNA | 792 | 2440 |  |
| *PM-milR-MC17* | XM_002149310.1| NADH-ubiquinone oxidoreductase 14 kDa subunit, putative, mRNA | 271 | 716 |  |
| *PM-milR-MC17* | XM_002149314.1| 37S ribosomal protein Mrp17, mRNA | 304 | 812 |  |
| *PM-milR-MC17* | XM_002149327.1| high-affinity nicotinic acid transporter, putative, mRNA | 358 | 1494 |  |
| *PM-milR-MC17* | XM_002149497.1| conserved hypothetical protein, mRNA | 144 | 1693 |  |
| *PM-milR-MC17* | XM_002149526.1| cell wall glucanase (Scw11), putative, mRNA | 604 | 2511 |  |
| *PM-milR-MC17* | XM_002149579.1| polyketide synthase, putative, mRNA | 2727 | 5265 |  |
| *PM-milR-MC17* | XM_002149616.1| conserved hypothetical protein, mRNA | 1232 | 1617 |  |
| *PM-milR-MC17* | XM_002149624.1| kinesin family protein, mRNA | 2585 | 5327 |  |
| *PM-milR-MC17* | XM_002149673.1| MFS transporter, putative, mRNA | 281 | 1443 |  |
| *PM-milR-MC17* | XM_002149674.1| MFS transporter, putative, mRNA | 281 | 1506 |  |
| *PM-milR-MC17* | XM_002149874.1| conserved hypothetical protein, mRNA | 149 | 1797 |  |
| *PM-milR-MC17* | XM_002149953.1| aspartyl-tRNA synthetase, cytoplasmic, mRNA | 690 | 2856 |  |
| *PM-milR-MC17* | XM_002149960.1| NTF2 and RRM domain protein, mRNA | 1006 | 1650 |  |
| *PM-milR-MC17* | XM_002149999.1| probable O-sialoglycoprotein endopeptidase, mRNA | 49 | 1522 |  |
| *PM-milR-MC17* | XM_002150040.1| DENN (AEX-3) domain protein, mRNA | 2148 | 3385 |  |
| *PM-milR-MC17* | XM_002150084.1| 1,3-beta-glucanosyltransferase Gel2, mRNA | 790 | 1637 |  |
| *PM-milR-MC17* | XM_002150108.1| acetyl xylan esterase (Axe1), putative, mRNA | 508 | 1117 |  |
| *PM-milR-MC17* | XM_002150141.1| 60S ribosomal protein P0, mRNA | 792 | 1160 |  |
| *PM-milR-MC17* | XM_002150150.1| SAM domain protein, mRNA | 198 | 2538 |  |
| *PM-milR-MC17* | XM_002150176.1| general stress response phosphoprotein phosphatase Psr1/2, putative, mRNA | 1891 | 2627 |  |
| *PM-milR-MC17* | XM_002150199.1| NADH-cytochrome b5 reductase, putative, mRNA | 449 | 1313 |  |
| *PM-milR-MC17* | XM_002150200.1| NADH-cytochrome b5 reductase, putative, mRNA | 513 | 1377 |  |
| *PM-milR-MC17* | XM_002150223.1| cyclin (Pcl1), putative, mRNA | 690 | 1758 |  |
| *PM-milR-MC17* | XM_002150296.1| DUF726 domain protein, mRNA | 169 | 3359 |  |
| *PM-milR-MC17* | XM_002150421.1| C2H2 transcription factor (Seb1), putative, mRNA | 340 | 2630 |  |
| *PM-milR-MC17* | XM_002150430.1| 60S ribosomal protein L25, putative, mRNA | 464 | 1023 |  |
| *PM-milR-MC17* | XM_002150476.1| beta-lactamase family protein, mRNA | 28 | 1302 |  |
| *PM-milR-MC17* | XM_002150517.1| TBC domain protein, putative, mRNA | 1731 | 2609 |  |
| *PM-milR-MC17* | XM_002150525.1| Na/K ATPase alpha 1 subunit, putative, mRNA | 830 | 3502 |  |
| *PM-milR-MC17* | XM_002150625.1| amino acid permease, putative, mRNA | 1233 | 1915 |  |
| *PM-milR-MC17* | XM_002150643.1| GPI-anchored cell wall beta-1,3-endoglucanase EglC, mRNA | 761 | 1738 |  |
| *PM-milR-MC17* | XM_002150702.1| conserved hypothetical protein, mRNA | 1322 | 3694 |  |
| *PM-milR-MC17* | XM_002150714.1| conserved hypothetical protein, mRNA | 864 | 1604 |  |
| *PM-milR-MC17* | XM_002150793.1| C2H2 finger domain protein, putative, mRNA | 885 | 3779 |  |
| *PM-milR-MC17* | XM_002150814.1| origin recognition complex subunit 3, putative, mRNA | 1577 | 2127 |  |
| *PM-milR-MC17* | XM_002150889.1| conserved hypothetical protein, mRNA | 627 | 837 |  |
| *PM-milR-MC17* | XM_002150900.1| conserved hypothetical protein, mRNA | 364 | 1785 |  |
| *PM-milR-MC17* | XM_002150971.1| hypothetical protein, mRNA | 20 | 1335 |  |
| *PM-milR-MC17* | XM_002151137.1| polyubiquitin UbiD/Ubi4, putative, mRNA | 308 | 1186 |  |
| *PM-milR-MC17* | XM_002151138.1| C6 finger domain protein, putative, mRNA | 2158 | 3173 |  |
| *PM-milR-MC17* | XM_002151210.1| NADH-ubiquinone oxidoreductase, subunit F, putative, mRNA | 65 | 1645 |  |
| *PM-milR-MC17* | XM_002151261.1| MFS monocarboxylate transporter, putative, mRNA | 1247 | 1639 |  |
| *PM-milR-MC17* | XM_002151273.1| conserved hypothetical protein, mRNA | 2728 | 2833 |  |
| *PM-milR-MC17* | XM_002151282.1| conserved hypothetical protein, mRNA | 1041 | 3212 |  |
| *PM-milR-MC17* | XM_002151306.1| tubulin-specific chaperone, putative, mRNA | 1553 | 1880 |  |
| *PM-milR-MC17* | XM_002151316.1| anthranilate phosphoribosyltransferase, putative, mRNA | 492 | 1406 |  |
| *PM-milR-MC17* | XM_002151322.1| endosomal peripheral membrane protein (Mon2), putative, mRNA | 2047 | 5214 |  |
| *PM-milR-MC17* | XM_002151366.1| MFS multidrug transporter, putative, mRNA | 1924 | 2704 |  |
| *PM-milR-MC17* | XM_002151385.1| ammonium transporter (Mep2), putative, mRNA | 1227 | 1870 |  |
| *PM-milR-MC17* | XM_002151386.1| MAP kinase kinase kinase SskB, putative, mRNA | 1892 | 4344 |  |
| *PM-milR-MC17* | XM_002151550.1| C2H2 transcription factor (Egr2), putative, mRNA | 205 | 624 |  |
| *PM-milR-MC17* | XM_002151572.1| hypothetical protein, mRNA | 273 | 951 |  |
| *PM-milR-MC17* | XM_002151672.1| eukaryotic translation initiation factor 3 subunit EifCk, putative, mRNA | 2 | 1076 |  |
| *PM-milR-MC17* | XM_002151718.1| conserved hypothetical protein, mRNA | 100 | 714 |  |
| *PM-milR-MC17* | XM_002151733.1| conserved hypothetical protein, mRNA | 123 | 318 |  |
| *PM-milR-MC17* | XM_002151737.1| conserved hypothetical protein, mRNA | 643 | 1268 |  |
| *PM-milR-MC17* | XM_002151779.1| SET domain protein, mRNA | 2016 | 4099 |  |
| *PM-milR-MC17* | XM_002151780.1| conserved hypothetical protein, mRNA | 599 | 1904 |  |
| *PM-milR-MC17* | XM_002151811.1| phosphomannomutase (Sec53), putative, mRNA | 342 | 1163 |  |
| *PM-milR-MC17* | XM_002151825.1| sulfate transporter, putative, mRNA | 113 | 1361 |  |
| *PM-milR-MC17* | XM_002151904.1| 40S ribosomal protein S17, putative, mRNA | 1541 | 1660 |  |
| *PM-milR-MC17* | XM_002151945.1| C2H2 transcription factor (Con7), putative, mRNA | 173 | 2435 |  |
| *PM-milR-MC17* | XM_002151946.1| C2H2 transcription factor (Con7), putative, mRNA | 173 | 2291 |  |
| *PM-milR-MC17* | XM_002151947.1| C2H2 transcription factor (Con7), putative, mRNA | 173 | 2300 |  |
| *PM-milR-MC17* | XM_002151948.1| C2H2 transcription factor (Con7), putative, mRNA | 173 | 2348 |  |
| *PM-milR-MC17* | XM_002151949.1| C2H2 transcription factor (Con7), putative, mRNA | 173 | 2421 |  |
| *PM-milR-MC17* | XM_002152107.1| Mob1 family protein, mRNA | 211 | 1946 |  |
| *PM-milR-MC17* | XM_002152116.1| dimethyladenosine transferase, mRNA | 512 | 1329 |  |
| *PM-milR-MC17* | XM_002152303.1| glycosyl transferase, putative, mRNA | 2319 | 3253 |  |
| *PM-milR-MC17* | XM_002152305.1| hypothetical protein, mRNA | 584 | 2271 |  |
| *PM-milR-MC17* | XM_002152350.1| conserved hypothetical protein, mRNA | 1541 | 1752 |  |
| *PM-milR-MC17* | XM_002152567.1| conserved hypothetical protein, mRNA | 1042 | 2946 |  |
| *PM-milR-MC17* | XM_002152643.1| cell cycle protein kinase, putative, mRNA | 370 | 1984 |  |
| *PM-milR-MC17* | XM_002152713.1| alpha,alpha-trehalose glucohydrolase TreA/Ath1, mRNA | 1086 | 3120 |  |
| *PM-milR-MC17* | XM_002152720.1| MFS monocarboxylate transporter, putative, mRNA | 25 | 1317 |  |
| *PM-milR-MC17* | XM_002152732.1| beta-1,6-glucanase Neg1, putative, mRNA | 970 | 1500 |  |
| *PM-milR-MC17* | XM_002152734.1| DUF1212 domain membrane protein, mRNA | 2250 | 2484 |  |
| *PM-milR-MC17* | XM_002152745.1| H /K ATPase alpha subunit, putative, mRNA | 318 | 3482 |  |
| *PM-milR-MC17* | XM_002152776.1| plasma membrane channel protein (Aqy1), putative, mRNA | 2140 | 2412 |  |
| *PM-milR-MC17* | XM_002152965.1| hypothetical protein, mRNA | 464 | 3516 |  |
| *PM-milR-MC17* | XM_002152981.1| conserved hypothetical protein, mRNA | 769 | 1191 |  |
| *PM-milR-MC17* | XM_002153056.1| ABC transporter, putative, mRNA | 24 | 4865 |  |
| *PM-milR-MC17* | XM_002153098.1| molybdopterin synthase small subunit CnxG, mRNA | 17 | 279 |  |
| *PM-milR-MC17* | XM_002153100.1| conserved hypothetical protein, mRNA | 266 | 3573 |  |
| *PM-milR-MC17* | XM_002153293.1| hydrolase, alpha/beta fold family protein, mRNA | 1601 | 1677 |  |
| *PM-milR-MC17* | XM_002153322.1| MFS transporter, putative, mRNA | 936 | 1987 |  |
| *PM-milR-MC17* | XM_002153369.1| short-chain dehydrogenases/reductase, putative, mRNA | 447 | 1032 |  |
| *PM-milR-MC17* | XM_002153408.1| sucrose transport protein, putative, mRNA | 921 | 1899 |  |
| *PM-milR-MC17* | XM_002153438.1| peroxisome biosynthesis protein (PAS8/Peroxin-6), putative, mRNA | 1662 | 4596 |  |
| *PM-milR-MC17* | XM_002153521.1| FHA domain protein, mRNA | 434 | 2379 |  |
| *PM-milR-MC17* | XM_002153548.1| RNA polymerase II general transcription and DNA repair factor TFIIH component Tfb5, putative, mRNA | 46 | 1151 |  |
| *PM-milR-MC17* | XM_002153578.1| conserved hypothetical protein, mRNA | 835 | 2577 |  |
| *PM-milR-MC17* | XM_002153589.1| MFS transporter of unkown specificity, mRNA | 1049 | 1633 |  |
| *PM-milR-MC17* | XM_002153653.1| hypothetical protein, mRNA | 28 | 399 |  |
| *PM-milR-MC17* | XM_002153657.1| conserved hypothetical protein, mRNA | 682 | 1575 |  |
| *PM-milR-MC17* | XM_002153659.1| hypothetical protein, mRNA | 874 | 2855 |  |
| *PM-milR-MC17* | XM_002153678.1| reverse transcriptase, putative, mRNA | 520 | 1888 |  |
| *PM-milR-YC1* | XM_002143780.1| conserved hypothetical protein, mRNA | 312 | 999 |  |
| *PM-milR-YC1* | XM_002153194.1| RNA methyltransferase, putative, mRNA | 514 | 1300 |  |
| *PM-milR-YC1* | XM_002153466.1| alpha-mannosidase, mRNA | 425 | 3276 |  |
| *PM-milR-YC2* | XM_002145664.1| conserved hypothetical protein, mRNA | 272 | 2499 |  |
| *PM-milR-YC3* | XM_002145038.1| DUF1264 domain protein, mRNA | 982 | 1155 |  |
| *PM-milR-YC3* | XM_002152662.1| histone H2B, mRNA | 616 | 1305 |  |
| *PM-milR-YC3* | XM_002144322.1| ubiquitin fusion degradation protein UfdB, putative, mRNA | 482 | 3192 |  |
| *PM-milR-YC3* | XM_002145038.1| DUF1264 domain protein, mRNA | 981 | 1155 | perfectly complementary |
| *PM-milR-YC4* | XM_002143303.1| hypothetical protein, mRNA | 856 | 956 |  |
| *PM-milR-YC4* | XM_002149698.1| protein kinase, putative, mRNA | 730 | 3773 |  |
| *PM-milR-YC5* | XM_002143637.1| stress response protein Nst1, putative, mRNA | 1791 | 4314 |  |
| *PM-milR-YC5* | XM_002151779.1| SET domain protein, mRNA | 2835 | 4099 |  |
| *PM-milR-YC5* | XM_002143393.1| chromosome segregation protein Cse1, putative, mRNA | 2761 | 3411 |  |
| *PM-milR-YC5* | XM_002143583.1| peroxisomal dehydratase, putative, mRNA | 1377 | 1779 |  |
| *PM-milR-YC5* | XM_002144121.1| DUF1295 domain protein, mRNA | 801 | 1157 |  |
| *PM-milR-YC5* | XM_002146418.1| nonribosomal siderophore peptide synthase, putative, mRNA | 2029 | 15318 |  |
| *PM-milR-YC5* | XM_002146580.1| ubiquitin hydrolase L3, mRNA | 690 | 852 |  |
| *PM-milR-YC5* | XM_002147049.1| conserved hypothetical protein, mRNA | 1457 | 4671 |  |
| *PM-milR-YC5* | XM_002148515.1| conserved hypothetical protein, mRNA | 1388 | 4494 |  |
| *PM-milR-YC5* | XM_002148861.1| N,N-dimethylglycine oxidase, mRNA | 1248 | 1479 |  |
| *PM-milR-YC5* | XM_002148885.1| beta-galactosidase, putative, mRNA | 2968 | 3000 |  |
| *PM-milR-YC5* | XM_002149766.1| conserved hypothetical protein, mRNA | 1457 | 4431 |  |
| *PM-milR-YC5* | XM_002150658.1| conserved hypothetical protein, mRNA | 413 | 2346 |  |
| *PM-milR-YC5* | XM_002151109.1| transcription factor, putative, mRNA | 1895 | 2605 |  |
| *PM-milR-YC5* | XM_002152788.1| conserved hypothetical protein, mRNA | 1668 | 5236 |  |
| *PM-milR-YC6* | XM_002144523.1| heterogeneous nuclear ribonucleoprotein HRP1, mRNA | 1324 | 1365 |  |
| *PM-milR-YC6* | XM_002145827.1| conserved hypothetical protein, mRNA | 693 | 2073 |  |
| *PM-milR-YC6* | XM_002146225.1| nitrite reductase NiiA, mRNA | 680 | 3294 |  |
| *PM-milR-YC6* | XM_002146859.1| sugar 1,4-lactone oxidase, putative, mRNA | 1574 | 1890 |  |
| *PM-milR-YC6* | XM_002146962.1| nonribosomal peptide synthase, putative, mRNA | 7019 | 16626 |  |
| *PM-milR-YC6* | XM_002147380.1| cytochrome c oxidase assembly protein (Pet191), putative, mRNA | 818 | 1220 |  |
| *PM-milR-YC6* | XM_002147381.1| cytochrome c oxidase assembly protein (Pet191), putative, mRNA | 976 | 1378 |  |
| *PM-milR-YC6* | XM_002148879.1| endoplasmic reticulum DnaJ domain protein Erj5, putative, mRNA | 1125 | 1330 |  |
| *PM-milR-YC6* | XM_002151161.1| cell cycle regulatory protein, putative, mRNA | 1602 | 2787 |  |
| *PM-milR-YC6* | XM_002151222.1| proteasome activator subunit 4, putative, mRNA | 3341 | 6537 |  |
| *PM-milR-YC6* | XM_002152059.1| hypothetical protein, mRNA | 1289 | 1344 |  |
| *PM-milR-YC6* | XM_002153707.1| RNA interference and gene silencing protein (Qde2), putative, mRNA | 455 | 3892 |  |
| *PM-milR-YC6* | XM_002143093.1| hypothetical protein, mRNA | 1612 | 2094 |  |
| *PM-milR-YC6* | XM_002143101.1| conserved hypothetical protein, mRNA | 1309 | 1551 |  |
| *PM-milR-YC6* | XM_002143799.1| myo-inositol-phosphate synthase, putative, mRNA | 1443 | 2312 |  |
| *PM-milR-YC6* | XM_002143906.1| t-complex protein 1, gamma subunit (Cct3), putative, mRNA | 1341 | 1898 |  |
| *PM-milR-YC6* | XM_002144564.1| DNA replication licensing factor Mcm4, putative, mRNA | 755 | 3083 |  |
| *PM-milR-YC6* | XM_002144644.1| NRPS-like enzyme, putative, mRNA | 2741 | 3126 |  |
| *PM-milR-YC6* | XM_002144825.1| transesterase (LovD), putative, mRNA | 945 | 1337 |  |
| *PM-milR-YC6* | XM_002145209.1| KH domain protein, mRNA | 369 | 3491 |  |
| *PM-milR-YC6* | XM_002145210.1| chitin synthase ChsE, mRNA | 4640 | 5950 |  |
| *PM-milR-YC6* | XM_002145297.1| conserved hypothetical protein, mRNA | 225 | 2658 |  |
| *PM-milR-YC6* | XM_002145756.1| polyketide synthase, putative, mRNA | 1146 | 6516 |  |
| *PM-milR-YC6* | XM_002146024.1| glutathione oxidoreductase Glr1, putative, mRNA | 1248 | 1942 |  |
| *PM-milR-YC6* | XM_002146120.1| oligopeptide transporter, OPT family, putative, mRNA | 324 | 2562 |  |
| *PM-milR-YC6* | XM_002146124.1| conserved hypothetical protein, mRNA | 2221 | 3000 |  |
| *PM-milR-YC6* | XM_002146186.1| geranylgeranyl diphosphate synthase, mRNA | 419 | 2137 |  |
| *PM-milR-YC6* | XM_002146263.1| TMEM1 family protein, putative, mRNA | 1032 | 4496 |  |
| *PM-milR-YC6* | XM_002146356.1| condensin complex component cnd2, mRNA | 333 | 2772 |  |
| *PM-milR-YC6* | XM_002146368.1| cell-cycle checkpoint protein kinase, putative, mRNA | 1115 | 2416 |  |
| *PM-milR-YC6* | XM_002146617.1| sister chromatid separation protein (Src1), putative, mRNA | 1993 | 2301 |  |
| *PM-milR-YC6* | XM_002147122.1| hypothetical protein, mRNA | 1540 | 2676 |  |
| *PM-milR-YC6* | XM_002147125.1| conserved hypothetical protein, mRNA | 286 | 1065 |  |
| *PM-milR-YC6* | XM_002147612.1| conserved hypothetical protein, mRNA | 1031 | 1503 |  |
| *PM-milR-YC6* | XM_002147752.1| hypothetical protein, mRNA | 1272 | 1404 |  |
| *PM-milR-YC6* | XM_002147840.1| aldo-keto reductase, putative, mRNA | 565 | 1158 |  |
| *PM-milR-YC6* | XM_002148534.1| reverse transcriptase, putative, mRNA | 476 | 3789 |  |
| *PM-milR-YC6* | XM_002148901.1| enolase/allergen Asp F 22, mRNA | 62 | 1482 |  |
| *PM-milR-YC6* | XM_002149014.1| lipase 8 precursor, putative, mRNA | 1173 | 1329 |  |
| *PM-milR-YC6* | XM_002149058.1| RNA binding protein Nrd1, putative, mRNA | 1188 | 2363 |  |
| *PM-milR-YC6* | XM_002149059.1| RNA binding protein Nrd1, putative, mRNA | 1188 | 1861 |  |
| *PM-milR-YC6* | XM_002149171.1| pyruvate dehydrogenase E1 component alpha subunit, putative, mRNA | 1026 | 1410 |  |
| *PM-milR-YC6* | XM_002149622.1| MFS lactose permease, putative, mRNA | 1605 | 1641 |  |
| *PM-milR-YC6* | XM_002149753.1| hypothetical protein, mRNA | 702 | 2052 |  |
| *PM-milR-YC6* | XM_002149763.1| conserved hypothetical protein, mRNA | 236 | 1203 |  |
| *PM-milR-YC6* | XM_002149779.1| hypothetical protein, mRNA | 667 | 735 |  |
| *PM-milR-YC6* | XM_002149914.1| conserved hypothetical protein, mRNA | 556 | 741 |  |
| *PM-milR-YC6* | XM_002149965.1| short-chain dehydrogenase, putative, mRNA | 181 | 999 |  |
| *PM-milR-YC6* | XM_002150429.1| mRNA splicing protein (Prp39), putative, mRNA | 955 | 1989 |  |
| *PM-milR-YC6* | XM_002150542.1| GPR/FUN34 family protein, mRNA | 708 | 1460 |  |
| *PM-milR-YC6* | XM_002150699.1| pre-mRNA splicing helicase, putative, mRNA | 1228 | 6753 |  |
| *PM-milR-YC6* | XM_002150730.1| alpha-N-acetylglucosaminidase, putative, mRNA | 523 | 2797 |  |
| *PM-milR-YC6* | XM_002150808.1| conserved hypothetical protein, mRNA | 1387 | 2004 |  |
| *PM-milR-YC6* | XM_002151562.1| conserved hypothetical protein, mRNA | 596 | 747 |  |
| *PM-milR-YC6* | XM_002152173.1| hypothetical protein, mRNA | 181 | 939 |  |
| *PM-milR-YC6* | XM_002152267.1| zinc-binding oxidoreductase ToxD, putative, mRNA | 285 | 1399 |  |
| *PM-milR-YC6* | XM_002152358.1| conserved hypothetical protein, mRNA | 830 | 1545 |  |
| *PM-milR-YC6* | XM_002152698.1| bZIP transcription factor HacA, mRNA | 392 | 1629 |  |
| *PM-milR-YC6* | XM_002152778.1| conserved hypothetical protein, mRNA | 743 | 1633 |  |
| *PM-milR-YC6* | XM_002152806.1| MFS sugar transporter, putative, mRNA | 1628 | 2274 |  |
| *PM-milR-YC6* | XM_002152917.1| hypothetical protein, mRNA | 1390 | 2859 |  |
| *PM-milR-YC6* | XM_002153137.1| mRNA binding post-transcriptional regulator (Csx1), putative, mRNA | 414 | 1875 |  |
| *PM-milR-YC6* | XM_002153254.1| conserved hypothetical protein, mRNA | 1575 | 1644 |  |
| *PM-milR-YC6* | XM_002153336.1| Coatomer subunit alpha, putative, mRNA | 2002 | 4070 |  |
| *PM-milR-YC6* | XM_002153601.1| protein disulfide isomerase, putative, mRNA | 369 | 1294 |  |
| *PM-milR-YC6* | XM_002153619.1| DNA helicase recq, putative, mRNA | 982 | 4695 |  |
| *PM-milR-YC7* | XM_002143822.1| conserved hypothetical protein, mRNA | 5 | 2415 |  |
| *PM-milR-YC7* | XM_002143824.1| dihydroxy acid dehydratase Ilv3, putative, mRNA | 21 | 1925 |  |
| *PM-milR-YC7* | XM_002145052.1| Apc13 domain protein, mRNA | 352 | 588 |  |
| *PM-milR-YC7* | XM_002146490.1| conserved hypothetical protein, mRNA | 2234 | 2374 |  |
| *PM-milR-YC7* | XM_002146809.1| conserved hypothetical protein, mRNA | 236 | 3447 |  |
| *PM-milR-YC7* | XM_002146810.1| conserved hypothetical protein, mRNA | 236 | 3546 |  |
| *PM-milR-YC7* | XM_002146914.1| conserved hypothetical protein, mRNA | 871 | 1207 |  |
| *PM-milR-YC7* | XM_002147290.1| protein transport protein Sec24, putative, mRNA | 65 | 2816 |  |
| *PM-milR-YC7* | XM_002148448.1| phosphoserine aminotransferase, mRNA | 1268 | 1585 |  |
| *PM-milR-YC7* | XM_002149613.1| cytochrome P450, putative, mRNA | 239 | 501 |  |
| *PM-milR-YC7* | XM_002150352.1| WD repeat protein, mRNA | 3421 | 4044 |  |
| *PM-milR-YC7* | XM_002150581.1| EF hand domain protein, mRNA | 1781 | 3043 |  |
| *PM-milR-YC7* | XM_002151274.1| GINS complex subunit Psf3, putative, mRNA | 793 | 880 |  |
| *PM-milR-YC7* | XM_002151275.1| GINS complex subunit Psf3, putative, mRNA | 855 | 942 |  |
| *PM-milR-YC7* | XM_002152109.1| conserved hypothetical protein, mRNA | 357 | 1928 |  |
| *PM-milR-YC7* | XM_002143209.1| conserved hypothetical protein, mRNA | 243 | 954 |  |
| *PM-milR-YC7* | XM_002144014.1| conserved hypothetical protein, mRNA | 872 | 1389 |  |
| *PM-milR-YC7* | XM_002144498.1| ubiquitin hydrolase, putative, mRNA | 2432 | 2555 |  |
| *PM-milR-YC7* | XM_002144574.1| translation initiation protein Sua5, mRNA | 1024 | 1506 |  |
| *PM-milR-YC7* | XM_002144776.1| DNA repair and transcription protein (Xab2), putative, mRNA | 2436 | 2769 |  |
| *PM-milR-YC7* | XM_002145143.1| conserved hypothetical protein, mRNA | 2255 | 9215 |  |
| *PM-milR-YC7* | XM_002145188.1| aromatic aminotransferase Aro8, putative, mRNA | 1573 | 1908 |  |
| *PM-milR-YC7* | XM_002145227.1| conserved hypothetical protein, mRNA | 1016 | 1092 |  |
| *PM-milR-YC7* | XM_002146750.1| WD repeat protein, mRNA | 185 | 2293 |  |
| *PM-milR-YC7* | XM_002147163.1| conserved hypothetical protein, mRNA | 456 | 1598 |  |
| *PM-milR-YC7* | XM_002147859.1| pyridoxine biosynthesis protein, mRNA | 173 | 1179 |  |
| *PM-milR-YC7* | XM_002148040.1| alanine racemase family protein, putative, mRNA | 815 | 1015 |  |
| *PM-milR-YC7* | XM_002149657.1| alpha-1,6-mannosyltransferase subunit, putative, mRNA | 5388 | 5838 |  |
| *PM-milR-YC7* | XM_002150001.1| conserved hypothetical protein, mRNA | 895 | 1507 |  |
| *PM-milR-YC7* | XM_002150338.1| conserved hypothetical protein, mRNA | 139 | 1113 |  |
| *PM-milR-YC7* | XM_002150449.1| monocarboxylate permease, putative, mRNA | 309 | 1200 |  |
| *PM-milR-YC7* | XM_002150790.1| ABC multidrug transporter, putative, mRNA | 2402 | 5003 |  |
| *PM-milR-YC7* | XM_002151401.1| calcium channel subunit Cch1, mRNA | 543 | 6791 |  |
| *PM-milR-YC7* | XM_002152324.1| conserved hypothetical protein, mRNA | 1989 | 2386 |  |
| *PM-milR-YC7* | XM_002152713.1| alpha,alpha-trehalose glucohydrolase TreA/Ath1, mRNA | 489 | 3120 |  |
| *PM-milR-YC7* | XM_002152722.1| chlorohydrolase family protein, mRNA | 145 | 1564 |  |
| *PM-milR-YC7* | XM_002153429.1| hypothetical protein, mRNA | 530 | 714 |  |
